# Supplementary material for: Enantioselective manipulation of single chiral nanoparticles using optical tweezers
Source: Royal Society of Chemistry journal article supplement (doi:10.1039/c9nr09736h), 2020-01-01
Supplement: c9nr09736h1.pdf [file c9nr09736h1.pdf]

## Enantioselective manipulation of single chiral nanoparticles using optical tweezers: supplementary material

R. Ali,<sup>1,\*</sup> F. A. Pinheiro,<sup>1</sup> F. S. S. Rosa,<sup>1</sup> R. S. Dutra,<sup>2</sup> and P. A. Maia Neto<sup>1</sup>

<sup>1</sup>*Instituto de Física, Universidade Federal do Rio de Janeiro, Caixa Postal 68528, Rio de Janeiro, RJ, 21941-972, Brasil*

<sup>2</sup>*LISComp-IFRJ, Instituto Federal de Educação, Ciência e Tecnologia, Rua Sebastião de Lacerda, Paracambi, RJ, 26600-000, Brasil*

(Dated: November 14, 2019)

This supplement contains an expanded theoretical description of optical tweezers of particles with a chiral shell.

We consider a circularly-polarized Gaussian beam at the objective entrance port, with  $\sigma = \pm 1$  denoting left-handed/right-handed polarization. The dimensionless optical force efficiency (see main text for definition in terms of the optical force) is written as

$$\mathbf{Q}(\rho, \phi, z) = \mathbf{Q}_s(\rho, \phi, z) + \mathbf{Q}_e(\rho, \phi, z). \quad (1)$$

The extinction term  $\mathbf{Q}_e$  accounts for the rate of momentum removal from the incident beam, while the scattering

contribution  $\mathbf{Q}_s$  corresponds to the negative of the rate of momentum carried away by the scattered field. The explicit expressions for their cylindrical components are given below as sums over multipoles of the form

$$\sum_{\ell m} (\dots) \equiv \sum_{\ell=1}^{\infty} \sum_{m=-\ell}^{\ell} (\dots)$$

- Scattering axial component

$$Q_{sz}(\rho, \phi, z) = -\frac{8\gamma^2}{AN} \text{Re} \sum_{\ell m} \frac{\sqrt{\ell(\ell+2)(\ell+m+1)(\ell-m+1)}}{\ell+1} \left[ (A_\ell A_{\ell+1}^* + B_\ell B_{\ell+1}^*) G_{\ell,m}^{(\sigma)} G_{\ell+1,m}^{(\sigma)*} \right] \\ - \frac{8\gamma^2}{AN} \sigma \text{Re} \sum_{\ell m} \frac{(2\ell+1)}{\ell(\ell+1)} m A_\ell B_\ell^* |G_{\ell,m}^{(\sigma)}|^2$$

- Scattering radial component

$$Q_{s\rho}(\rho, \phi, z) = \frac{4\gamma^2}{AN} \sum_{\ell m} \frac{\sqrt{\ell(\ell+2)(\ell+m+1)(\ell+m+2)}}{\ell+1} \text{Im} \left\{ (A_\ell A_{\ell+1}^* + B_\ell B_{\ell+1}^*) \right. \\ \left. \left[ G_{\ell,m}^{(\sigma)} G_{\ell+1,m+1}^{(\sigma)*} + G_{\ell,-m}^{(\sigma)} G_{\ell+1,-(m+1)}^{(\sigma)*} \right] \right\} - \frac{8\gamma^2}{AN} \sigma \sum_{\ell m} \frac{(2\ell+1)}{\ell(\ell+1)} \sqrt{(\ell-m)(\ell+m+1)} \left[ \text{Re}(A_\ell B_\ell^*) \text{Im}(G_{\ell,m}^{(\sigma)} G_{\ell,m+1}^{(\sigma)*}) \right]$$

- Scattering azimuthal component

$$Q_{s\phi}(\rho, \phi, z) = -\frac{4\gamma^2}{AN} \sum_{\ell m} \frac{\sqrt{\ell(\ell+2)(\ell+m+1)(\ell+m+2)}}{\ell+1} \text{Re} \left\{ (A_\ell A_{\ell+1}^* + B_\ell B_{\ell+1}^*) \times \right. \\ \left. \left[ G_{\ell,m}^{(\sigma)} G_{\ell+1,m+1}^{(\sigma)*} - G_{\ell,-m}^{(\sigma)} G_{\ell+1,-(m+1)}^{(\sigma)*} \right] \right\} + \frac{8\gamma^2}{AN} \sigma \sum_{\ell m} \frac{(2\ell+1)}{\ell(\ell+1)} \sqrt{(\ell-m)(\ell+m+1)} \times \text{Re}(A_\ell B_\ell^*) \text{Re}(G_{\ell,m}^{(\sigma)} G_{\ell,m+1}^{(\sigma)*})$$

- Extinction axial component

$$Q_{ez}(\rho, \phi, z) = \frac{4\gamma^2}{AN} \text{Re} \sum_{\ell m} (2\ell+1) G_{\ell,m}^{(\sigma)} \left[ (A_\ell + B_\ell) G_{\ell,m}^{(\sigma)*} \right], \quad (2)$$

- Extinction radial component

$$Q_{e\rho}(\rho, \phi, z) = \frac{2\gamma^2}{AN} \text{Im} \sum_{\ell m} (2\ell + 1) G_{\ell, m}^{(\sigma)} \left[ (A_\ell + B_\ell) \left( G_{\ell, m+1}^{(\sigma)-} - G_{\ell, m-1}^{(\sigma)+} \right)^* \right]$$

- Extinction azimuthal component

$$Q_{e\phi}(\rho, \phi, z) = -\frac{2\gamma^2}{AN} \text{Re} \sum_{\ell m} (2\ell + 1) G_{\ell, m}^{(\sigma)} \left[ (A_\ell + B_\ell) \left( G_{\ell, m-1}^{(\sigma)+} + G_{\ell, m+1}^{(\sigma)-} \right)^* \right]$$

In addition to the multipole coefficients  $G_{\ell m}^{(\sigma)}(\rho, \phi, z)$  defined in Eq. (3) of the main letter, we also define

$$G_{\ell, m}^{\prime(\sigma)}(\rho, \phi, z) = \int_0^{\theta_0} d\theta \sin \theta \cos \theta_w \sqrt{\cos \theta} T(\theta) e^{-\gamma^2 \sin^2 \theta} d_{m, \sigma}^\ell(\theta_w) J_{m-\sigma}(k\rho \sin \theta) e^{i[\Phi_w(\theta) + k_w \cos \theta_w z]},$$

$$G_{\ell, m}^{(\sigma)\pm}(\rho, \phi, z) = \int_0^{\theta_0} d\theta \sin \theta \sin \theta_w \sqrt{\cos \theta} T(\theta) e^{-\gamma^2 \sin^2 \theta} d_{m\pm 1, \sigma}^\ell(\theta_w) J_{m-\sigma}(k\rho \sin \theta) e^{i[\Phi_w(\theta) + k_w \cos \theta_w z]},$$

with  $\theta_w = \sin^{-1}(\sin \theta/N)$  and  $N = n_w/n_g$ . The phase  $\Phi_w$  accounts for the spherical aberration arising from the refractive index mismatch at the glass-water interface:

$$\Phi_w(\theta) = k(-L/N \cos \theta + NL \cos \theta_w),$$

where  $L$  represents the distance between the paraxial focal plane and the glass slide. We also take  $T(\theta) = \frac{2 \cos \theta}{\cos \theta + N \cos \theta_w}$  for the Fresnel transmission amplitude (neglecting polarization dependence since  $N \approx 1$ ).

The factor

$$A = 16\gamma^2 \int_0^{s_0} ds s \exp(-2\gamma^2 s^2) \frac{\sqrt{(1-s^2)(N^2-s^2)}}{(\sqrt{1-s^2} + \sqrt{N^2-s^2})^2}$$

is the fraction of beam power transmitted into the sample chamber, with  $s_0 = \text{NA}/n_g$ .

The optical force components also depend on the effective external Mie coefficients  $A_\ell$  and  $B_\ell$  which we derive as follows:

$$\begin{aligned} A_\ell &= a_\ell + i\sigma d_\ell \\ B_\ell &= b_\ell - i\sigma c_\ell. \end{aligned} \quad (3)$$

$A_\ell$  and  $B_\ell$  are convenient for a number of applications involving circularly-polarized fields scattered by chiral media. The coefficients  $a_\ell$ ,  $b_\ell$ ,  $c_\ell$  and  $d_\ell$  are the external Mie coefficients for a sphere made of chiral material [1]. For a core-shell nanosphere, their explicit expressions [2] are given in terms of the size parameters  $\alpha = k_w a$  and  $v = k_w r$  corresponding to the core and outer radii  $a$  and  $r$ . The refractive indexes of the chiral shell (with respect to the host) are  $N_{L/R} = (\sqrt{\epsilon\mu} \pm \kappa)/n_w$ , where  $\kappa$  is the chirality parameter (see main text). We also need the relative refractive index of the core  $N_I$  with respect to the

host medium of index  $n_w$ . Finally,  $N_{\text{II}} = (N_L + N_R)/2$  is the average relative index of the chiral shell.

$$\begin{aligned} a_\ell &= -\Delta_\ell^{-1} (A_{R\ell} W_{L\ell} + A_{L\ell} W_{R\ell}) \\ b_\ell &= -\Delta_\ell^{-1} (B_{L\ell} V_{R\ell} + B_{R\ell} V_{L\ell}) \\ c_\ell &= i\Delta_\ell^{-1} (A_{L\ell} V_{R\ell} - A_{R\ell} V_{L\ell}) \\ d_\ell &= i\Delta_\ell^{-1} (B_{R\ell} W_{L\ell} - B_{L\ell} W_{R\ell}) \end{aligned}$$

with

$$\begin{aligned} \Delta_\ell &= W_{L\ell} V_{R\ell} + B_{L\ell} W_{R\ell} \\ A_{R\ell} &= X_{R\ell}(-) \eta_\ell^{(1)}(v) - N_{\text{II}} U_{R\ell}(-) j_\ell(v) \\ A_{L\ell} &= X_{L\ell}(+) \eta_\ell^{(1)}(v) - N_{\text{II}} U_{L\ell}(+) j_\ell(v) \\ B_{L\ell} &= X_{L\ell}(-) N_{\text{II}} \eta_\ell^{(1)}(v) - U_{L\ell}(-) j_\ell(v) \\ B_{R\ell} &= X_{R\ell}(+) N_{\text{II}} \eta_\ell^{(1)}(v) - U_{R\ell}(+) j_\ell(v) \\ V_{L\ell} &= X_{L\ell}(+) \eta_\ell^{(3)}(v) - N_{\text{II}} U_{L\ell}(+) h_\ell^{(1)}(v) \\ V_{R\ell} &= X_{R\ell}(-) \eta_\ell^{(3)}(v) - N_{\text{II}} U_{R\ell}(-) h_\ell^{(1)}(v) \\ W_{L\ell} &= X_{L\ell}(-) N_{\text{II}} \eta_\ell^{(3)}(v) - U_{L\ell}(-) h_\ell^{(1)}(v) \\ W_{R\ell} &= X_{R\ell}(+) N_{\text{II}} \eta_\ell^{(3)}(v) - U_{R\ell}(+) h_\ell^{(1)}(v) \end{aligned}$$

We have also introduced the functions

$$\begin{aligned} X_{R\ell}(\pm) &= j_\ell(N_R v) + D_{4\ell} y_\ell(N_R v) \pm D_{2\ell} y_\ell(N_L v) \\ X_{L\ell}(\pm) &= j_\ell(N_L v) + D_{1\ell} y_\ell(N_L v) \pm D_{3\ell} y_\ell(N_R v) \\ U_{R\ell}(\pm) &= \eta_\ell^{(1)}(N_R v) + D_{4\ell} \eta_\ell^{(2)}(N_R v) \pm D_{2\ell} \eta_\ell^{(2)}(N_L v) \\ U_{L\ell}(\pm) &= \eta_\ell^{(1)}(N_L v) + D_{1\ell} \eta_\ell^{(2)}(N_L v) \pm D_{3\ell} \eta_\ell^{(2)}(N_R v) \end{aligned}$$

where

$$D_{1\ell} = -\Delta_\ell^{-1}[G_\ell(N_R)H_\ell(N_L) + F_\ell(N_R)K_\ell(N_L)]$$

$$D_{2\ell} = \Delta_\ell^{-1}[F_\ell(N_R)K_\ell(N_R) - G_\ell(N_R)H_\ell(N_R)]$$

$$D_{3\ell} = \Delta_\ell^{-1}[G_\ell(N_L)H_\ell(N_L) - F_\ell(N_L)K_\ell(N_L)]$$

$$D_{4\ell} = -\Delta_\ell^{-1}[G_\ell(N_L)H_\ell(N_R) + F_\ell(N_L)K_\ell(N_R)]$$

$F, G, H$  and  $K$  are functions of the refractive index variable  $N = N_L, N_R$  defined as

$$F_\ell(N) = N_{\text{II}}y_\ell(N\alpha)\eta_\ell^{(1)}(N_I\alpha) - N_I\eta_\ell^{(2)}(N\alpha)j_\ell(N_I\alpha)$$

$$G_\ell(N) = N_Iy_\ell(N\alpha)\eta_\ell^{(1)}(N_I\alpha) - N_{\text{II}}\eta_\ell^{(2)}(N\alpha)j_\ell(N_I\alpha)$$

$$H_\ell(N) = N_Ij_\ell(N\alpha)\eta_\ell^{(1)}(N_I\alpha) - N_I\eta_\ell^{(1)}(N\alpha)j_\ell(N_I\alpha)$$

$$K_\ell(N) = N_{\text{II}}j_\ell(N\alpha)\eta_\ell^{(1)}(N_I\alpha) - N_{\text{II}}\eta_\ell^{(1)}(N\alpha)j_\ell(N_I\alpha)$$

$j_\ell(\rho)$ ,  $y_\ell(\rho)$  are the spherical Bessel functions of the first and second kind, respectively; whereas  $h_\ell^{(1)}(\rho)$  is the spherical Hankel function of the first kind [3]. We also define

$$\eta_\ell^{(1)}(\rho) = \frac{1}{\rho}d[\rho j_\ell(\rho)]/d\rho$$

$$\eta_\ell^{(2)}(\rho) = \frac{1}{\rho}d[\rho y_\ell(\rho)]/d\rho$$

$$\eta_\ell^{(3)}(\rho) = \frac{1}{\rho}d[\rho h_\ell^{(1)}(\rho)]/d\rho$$

- 
- [1] C. F. Bohren and D. R. Huffman, *Absorption and Scattering of Light by Small Particles* (Wiley, New York, 1983).  
 [2] C. F. Bohren, Scattering of electromagnetic waves by an optically active spherical shell, *J. Chem. Phys.* **62**, 1566 (1975).  
 [3] NIST digital library of mathematical functions. <https://dlmf.nist.gov/10.47#E3>, Release 1.0.16 of 2017-09-18.

[//dlmf.nist.gov/10.47#E3](https://dlmf.nist.gov/10.47#E3), Release 1.0.16 of 2017-09-18. F. W. J. Olver, A. B. Olde Daalhuis, D. W. Lozier, B. I. Schneider, R. F. Boisvert, C. W. Clark, B. R. Miller, and B. V. Saunders, eds.
